# Supplementary material for: Effects of statins on TH1 modulating cytokines in human subjects
Source: PeerJ. 2015 Feb 5;3:e764. doi: 10.7717/peerj.764 (PMC4327442; doi:10.7717/peerj.764)
Supplement: Data S1 [file peerj-03-764-s001.xlsx]

## Sheet: Sheet1
Effects of Cholesterol on Th1 Modulating Cytokines
Supplemental Data 1
	IL-27 (pg/ml)
Subject	No Statin	Atorvastatin	Pravastatin	Rosuvastatin
1	55.506	not detected	104.174	not detected
2	not detected	not detected	52.211	not detected
3	145.865	214.227	218.096	157.534
4	279.608	306.626	275.922	286.923
5	not detected	46.413	not detected	5.615
6	133.822	160.451	120.631	161.61
7	23.78	not detected	not detected	43.341
8	54.694	not detected	not detected	not detected
9	21.91	37.782	not detected	not detected
10	288.575	275.249	288.795	265.422
11	155.475	162.621	136.689	145.865
Average	128.804	171.91	170.931	152.33
Std Dev	101.623	103.743	90.7314	103.653
Std Error	33.8743	39.2111	34.2932	39.1772
%CV	78.8973	60.3472	53.0807	68.0452
	IL-18 (pg/ml)
Subject	No Statin	Atorvastatin	Pravastatin	Rosuvastatin
1	108.528	149.508	153.324	76.584
2	157.13	142.518	74.874	125.432
3	162.484	129.557	181.288	91.057
4	127.954	144.777	126.579	137.078
5	not detected	29.394	39.914	59.499
6	97.002	171.805	70.455	103.137
7	157.13	91.057	168.927	90.579
8	not detected	not detected	not detected	not detected
9	141.387	20.963	125.432	95.342
10	2.764	90.341	64.009	85.064
11	not detected	not detected	not detected	not detected
Average	119.297	107.769	111.645	95.9747
Std Dev	52.7578	53.8	50.9226	23.6847
Std Error	18.6527	17.9333	16.9742	7.89491
%CV	44.2238	49.9216	45.6113	24.6781
	IL-18 BP (pg/mL)
Subject	No Statin	Atorvastatin	Pravastatin	Rosuvastatin
1	1313.17	1436.63	3466.27	1444.44
2	1367.85	1192.52	1480.49	1370.45
3	2039.09	1676.75	1854.95	1963
4	1365.62	1642.92	1281.91	1852.35
5	1397.22	1419.9	1415.07	1401.69
6	1480.12	1356.32	1447.41	1796.51
7	2804.26	1605	1513.2	1788.33
8	1662.62	2178.1	2233.12	2013.72
9	2129.86	1720.63	2363.63	2113.41
10	2401.2	2526.92	2643.2	2502.04
11	1359.29	1696.45	1467.11	1547.39
Average	1756.39	1677.47	1924.21	1799.39
Std Dev	510.405	379.937	682.794	346.355
Std Error	153.893	114.555	205.87	104.43
%CV	29.0599	22.6495	35.4843	19.2484
	IL-12/IL-23 p40 (pg/mL)
Subject	No Statin	Atorvastatin	Pravastatin	Rosuvastatin
1	55.317	65.776	75.434	59.692
2	49.881	41.083	47.718	45.689
3	80.428	72.357	85.112	87.296
4	63.571	56.408	55.317	64.803
5	88.82	91.873	85.906	92.272
6	47.973	47.274	49.627	47.147
7	50.391	59.305	53.97	50.965
8	41.083	49.69	52.818	47.718
9	54.996	45.626	51.476	48.481
10	154.486	128.13	135.216	145.549
11	72.684	81.877	114.918	104.022
Average	69.0573	67.2181	73.4102	72.1485
Std Dev	31.9233	25.6812	29.4554	31.903
Std Error	9.62523	7.74317	8.88113	9.61911
%CV	46.2273	38.2058	40.1244	44.2185
	Total Cholesterol (mg/dL)
Subject	No Statin	Atorvastatin	Pravastatin	Rosuvastatin
1	185	132	140	136
2	226	192	186	187
3	186	125	186	159
4	199	159	215	154
5	198	103	131	135
6	200	134	164	137
7	226	157	178	166
8	246	159	167	184
9	204	138	160	154
10	192	100	124	147
11	216	156	144	169
Average	207.091	141.364	163.182	157.091
Std Dev	19.1753	26.9231	27.2904	18.1684
Std Error	5.78156	8.11763	8.22835	5.47798
%CV	9.25935	19.0453	16.7239	11.5655
	LDL Cholesterol (mg/dL)
Subject	No Statin	Atorvastatin	Pravastatin	Rosuvastatin
1	134	67	74	74
2	126	83	86	86
3	132	62	115	95
4	125	82	139	82
5	114	48	48	72
6	135	63	95	81
7	137	72	90	66
8	168	78	100	106
9	120	56	73	68
10	137	57	75	93
11	131	82	81	93
Average	132.8	66.8	89.5	82.3
Std Dev	14.5511	11.7832	25.1628	12.9018
Std Error	4.38731	3.55278	7.58687	3.89003
%CV	10.9571	17.6396	28.1149	15.6765
	HDL Cholesterol (mg/dL)
Subject	No Statin	Atorvastatin	Pravastatin	Rosuvastatin
1	36	44	45	44
2	70	100	80	74
3	40	46	50	51
4	55	64	62	54
5	50	45	53	55
6	50	48	54	48
7	75	70	74	93
8	49	58	55	53
9	43	38	47	44
10	41	34	41	41
11	45	48	38	51
Average	52	57	57.7778	57.3333
Std Dev	13.0384	19.1833	12.0393	16.0779
Std Error	3.93123	5.78399	3.62998	4.84768
%CV	25.0739	33.655	20.8372	28.0429
	Apolipoprotein A1 (mg/dL)
Subject	No Statin	Atorvastatin	Pravastatin	Rosuvastatin
1	134	121	112	132
2	174	198	176	179
3	Not Detected	113	129	140
4	153	144	137	143
5	133	121	130	147
6	141	113	121	140
7	165	156	141	191
8	136	132	133	136
9	115	102	119	123
10	112	98	112	118
11	138	127	114	132
Average	148	137.25	134.875	151
Std Dev	16.3503	28.8333	18.9393	21.6861
Std Error	4.92981	8.69356	5.71041	6.5386
%CV	11.0475	21.0078	14.0421	14.3616
	Lipoprotein (a) (mg/dL)
Subject	No Statin	Atorvastatin	Pravastatin	Rosuvastatin
1	3	3	3	3
2	12	13	14	14
3	Not Detected	3	5	4
4	5	4	3	3
5	7	7	5	7
6	4	3	3	4
7	9	6	7	14
8	3	4	3	4
9	14	12	15	15
10	3	6	4	6
11	3	3	3	4
Average	6.14286	5.375	5.375	6.625
Std Dev	3.38765	3.42	3.77728	4.71888
Std Error	1.02142	1.03117	1.13889	1.4228
%CV	55.1478	63.628	70.275	71.2284
